# Supplementary material
Source: publisher site journal article supplement (https://www.dovepress.com/article/448047)
Supplement: Supplementary file 1 [file get_supplementary_file.php]

| Writers | |  | Erasers | |  | Readers | |
| --- | --- | --- | --- | --- | --- | --- | --- |
| Gene | Type |  | Gene | Type |  | Gene | Type |
| METTL3 | Writers_m6a |  | FTO | Erasers_m6a |  | YTHDF1 | Readers_m6a |
| METTL14 | Writers_m6a |  | ALKBH5 | Erasers_m6a |  | YTHDF2 | Readers_m6a |
| WTAP | Writers_m6a |  | ALKBH3 | Erasers_m6a |  | YTHDF3 | Readers_m6a |
| KIAA1429 | Writers_m6a |  | ALKBH1 | Erasers_m1a |  | YTHDC1 | Readers_m6a |
| RBM15 | Writers_m6a |  | ALKBH3 | Erasers_m1a |  | YTHDC2 | Readers_m6a |
| RBM15B | Writers_m6a |  | TET2 | Erasers_m5c |  | HNRNPC | Readers_m6a |
| ZC3H13 | Writers_m6a |  |  |  |  | HNRNPG | Readers_m6a |
| CBLL1 | Writers_m6a |  |  |  |  | HNRNPA2B1 | Readers_m6a |
| METTL16 | Writers_m6a |  |  |  |  | IGF2BP1 | Readers_m6a |
| METTL5 | Writers_m6a |  |  |  |  | IGF2BP2 | Readers_m6a |
| ZCCHC4 | Writers_m6a |  |  |  |  | IGF2BP3 | Readers_m6a |
| PCIF1 | Writers_m6a |  |  |  |  | FMRP | Readers_m6a |
| METTL4 | Writers_m6a |  |  |  |  | LRPPRC | Readers_m6a |
| TRMT6 | Writers_m1a |  |  |  |  | eIF3 | Readers_m6a |
| TRMT61A | Writers_m1a |  |  |  |  | SND1 | Readers_m6a |
| RRP8 | Writers_m1a |  |  |  |  | PRRC2A | Readers_m6a |
| TRMT61B | Writers_m1a |  |  |  |  | Ribosome | Readers_m6a |
| TRMT10C | Writers_m1a |  |  |  |  | RBMX | Readers_m6a |
| RBMY1A1 | Writers_m1a |  |  |  |  | FMR1 | Readers_m6a |
| TRDMT1 | Writers_m5c |  |  |  |  | YBX1 | Readers_m6a |
| NSUN1 | Writers_m5c |  |  |  |  | BMT2 | Readers_m1a |
| NSUN2 | Writers_m5c |  |  |  |  | ALYREF | Readers_m5c |
| NSUN3 | Writers_m5c |  |  |  |  |  |  |
| NSUN4 | Writers_m5c |  |  |  |  |  |  |
| NSUN5 | Writers_m5c |  |  |  |  |  |  |
| NSUN6 | Writers_m5c |  |  |  |  |  |  |
| NSUN7 | Writers_m5c |  |  |  |  |  |  |
| DNMT1 | Writers_m5c |  |  |  |  |  |  |
| DNMT2 | Writers_m5c |  |  |  |  |  |  |
| DNMT3A | Writers_m5c |  |  |  |  |  |  |
| DNMT3B | Writers_m5c |  |  |  |  |  |  |
| NOP2 | Writers_m5c |  |  |  |  |  |  |

Table S1. The investigated methylation regulator genes in this study

Table S2. The analysis of differentially expressed genes (DEGs) for the m6A/m5C/m1A genes between hepatocellular carcinoma (HCC) and adjacent para-cancerous liver tissues in the Cancer Genome Atlas (TCGA) cohort.

| No. | Gene | Log2 Fold Change | Adj. p-value | Means  (HCC) | Means  (Adjacent) | Type | Targets identified from scRNA sequencing |
| --- | --- | --- | --- | --- | --- | --- | --- |
| 1 | ALKBH1 | -0.285 | 0.007 | 3.085 | 3.370 | Erasers_m1a |  |
| 2 | ALKBH3 | -0.270 | 0.183 | 3.849 | 4.119 | Erasers_m1a |  |
| 4 | ALKBH5 | -0.263 | 0.046 | 6.170 | 6.434 | Erasers_m6a | Yes |
| 5 | ALYREF | 0.780 | 0 | 6.303 | 5.522 | Readers_m5c |  |
| 6 | BMT2 | 0.231 | 0.026 | 1.970 | 1.739 | Readers_m1a |  |
| 7 | CBLL1 | 0.251 | 0.011 | 3.585 | 3.334 | Writers_m6a |  |
| 8 | DNMT1 | 0.848 | 0 | 3.647 | 2.799 | Writers_m5c | Yes |
| 9 | DNMT3A | 0.859 | 0 | 2.795 | 1.937 | Writers_m5c | Yes |
| 10 | DNMT3B | 0.765 | 0 | 1.517 | 0.752 | Writers_m5c |  |
| 11 | FMR1 | 0.008 | 0.973 | 4.275 | 4.267 | Readers_m6a |  |
| 12 | FTO | -0.212 | 0.146 | 2.747 | 2.959 | Erasers_m6a |  |
| 13 | HNRNPA2B1 | 0.444 | 0 | 7.716 | 7.271 | Readers_m6a |  |
| 14 | HNRNPC | 0.374 | 0 | 6.825 | 6.451 | Readers_m6a |  |
| 15 | IGF2BP1 | 1.491 | 0 | 1.573 | 0.082 | Readers_m6a | Yes |
| 16 | IGF2BP2 | 1.010 | 0.017 | 2.631 | 1.621 | Readers_m6a | Yes |
| 17 | IGF2BP3 | 0.659 | 0.004 | 0.762 | 0.103 | Readers_m6a | Yes |
| 18 | LRPPRC | 0.125 | 0.289 | 5.391 | 5.266 | Readers_m6a |  |
| 19 | METTL14 | -0.418 | 0 | 3.185 | 3.603 | Writers_m6a |  |
| 20 | METTL16 | 0.094 | 0.490 | 2.588 | 2.494 | Writers_m6a |  |
| 21 | METTL3 | 0.544 | 0 | 3.551 | 3.007 | Writers_m6a | Yes |
| 22 | METTL4 | 0.214 | 0.023 | 2.029 | 1.815 | Writers_m6a |  |
| 23 | METTL5 | 0.473 | 0 | 4.732 | 4.260 | Writers_m6a |  |
| 24 | NOP2 | 0.517 | 0 | 4.456 | 3.938 | Writers_m5c |  |
| 25 | NSUN2 | -0.102 | 0.344 | 5.087 | 5.189 | Writers_m5c |  |
| 26 | NSUN3 | -0.123 | 0.165 | 2.008 | 2.131 | Writers_m5c |  |
| 27 | NSUN4 | -0.030 | 0.806 | 2.901 | 2.930 | Writers_m5c |  |
| 28 | NSUN5 | 0.862 | 0 | 4.659 | 3.797 | Writers_m5c | Yes |
| 29 | NSUN6 | -1.132 | 0 | 4.270 | 5.402 | Writers_m5c |  |
| 30 | NSUN7 | 0.002 | 0.992 | 0.478 | 0.477 | Writers_m5c |  |
| 31 | PCIF1 | 0.329 | 0.001 | 5.004 | 4.675 | Writers_m6a |  |
| 32 | PRRC2A | 0.532 | 0.001 | 5.725 | 5.193 | Readers_m6a | Yes |
| 33 | RBM15 | -0.159 | 0.136 | 2.901 | 3.060 | Writers_m6a |  |
| 34 | RBM15B | 0.357 | 0 | 4.503 | 4.146 | Writers_m6a | Yes |
| 35 | RBMX | 0.521 | 0 | 5.468 | 4.946 | Readers_m6a |  |
| 36 | RBMY1A1 | 0.004 | 0.769 | 0.004 | 0 | Writers_m1a |  |
| 37 | RRP8 | -0.017 | 0.901 | 3.322 | 3.339 | Writers_m1a |  |
| 38 | SND1 | 0.480 | 0 | 6.928 | 6.448 | Readers_m6a |  |
| 39 | TET2 | -0.407 | 0 | 1.236 | 1.643 | Erasers_m5c |  |
| 40 | TRDMT1 | -0.086 | 0.183 | 0.514 | 0.600 | Writers_m5c |  |
| 41 | TRMT10C | -0.111 | 0.316 | 5.152 | 5.264 | Writers_m1a |  |
| 42 | TRMT6 | 0.573 | 0 | 3.644 | 3.071 | Writers_m1a | Yes |
| 43 | TRMT61A | 0.547 | 0 | 4.491 | 3.943 | Writers_m1a |  |
| 44 | TRMT61B | -0.098 | 0.485 | 3.531 | 3.629 | Writers_m1a |  |
| 45 | WTAP | -0.169 | 0.180 | 4.557 | 4.725 | Writers_m6a | Yes |
| 46 | YBX1 | 0.369 | 0.019 | 8.692 | 8.323 | Readers_m6a | Yes |
| 47 | YTHDC1 | -0.267 | 0.003 | 4.224 | 4.491 | Readers_m6a | Yes |
| 49 | YTHDC2 | -0.256 | 0.039 | 2.928 | 3.184 | Readers_m6a |  |
| 50 | YTHDF1 | 0.197 | 0.018 | 5.673 | 5.476 | Readers_m6a |  |
| 52 | YTHDF2 | -0.121 | 0.215 | 5.286 | 5.407 | Readers_m6a |  |
| 54 | YTHDF3 | -0.132 | 0.322 | 5.050 | 5.182 | Readers_m6a |  |
| 56 | ZC3H13 | -0.754 | 0 | 3.520 | 4.274 | Writers_m6a |  |
| 57 | ZCCHC4 | 0.081 | 0.428 | 2.349 | 2.269 | Writers_m6a |  |

Table S3. The primers of the methylation regulator genes used in the real-time polymerase chain reaction

| Gene | Forward primer | Reverse primer |
| --- | --- | --- |
| DNMT1 | 5’- CATCTCTTGGGTCGGAGAAGCC-3’ | 5’- GCGCCGTGACCCTTGCTAGATA-3’ |
| NSUN5 | 5’-TGCATGAACACCCACTGTACCG-3’ | 5’- GAGCAGCCAAGTGACTGGTCTTA-3’ |
| TRMT6 | 5'-AGTGCATGTAGCTGACGTGA-3' | 5'-CTCTGATAGCCGTGTGATGA-3' |
| IGF2BP1 | 5’- ACGGTGAACGAGTTGCAGAAT-3’ | 5’- GATGCTGCTGCTTAACCTGGG-3’ |
| IGF2BP3 | 5’- TCCGTATCCAAGCAGAAACCATGTG-3’ | 5’- CCTTCAGGAGTAGAGAGGATAGTAATCGAC-3’ |
| YTHDC1 | 5’-ATCTGAAAGAAACAAGCGTCTAGATGC-3’ | 5’-TTCTCTCAGAACCATCTGGCGTAGG-3’ |
| METTL3 | 5’- GGAACACTGCTTGGTTGGTGTC-3’ | 5’- GGTCGTCCAAATAACTCAATCTTGCG-3’ |
| METTL5 | 5’-TGTTGGATTTGACATAGATGAAGACGCA-3’ | 5’-TTTGGTCCCAAAGGGAGGATTCATAATTAC-3’ |
| WTAP | 5’-GCAAGTCCAGCAGCCGAG-3’ | 5’-TCAGGCGTAAACTTCCAGGCAC-3’ |
| RBM15 | 5’-CTTTCAGAGAAGTGGATGAGATTTCACCC-3’ | 5’-GGCCTCTTGATATCTACTTCTGTGATGAC-3’ |
| IGF2BP2 | 5’- TTGAAATCATGCAGAAAGAGGCAGATGAG-3’ | 5’- ATTGTTATCTTGGTCCCTGTTTCATGT-3’ |
| YTHDC2 | 5’- ATCGCTGTGGCTGAAAGAGTT-3’ | 5’- ATCTCCTGCCATCAATGTACGAAGCAATA-3’ |
| YTHDF1 | 5’- CAGCTCAGTAACGGAGACCATCATT-3’ | 5’- CTGCTGACCTTGAGACCCAC-3’ |
| YTHDF2 | 5’-TCCCAGGACAAATGGAAGGGT-3’ | 5’-TGGTGTGCTTGTAGCTGGCTATAAT-3’ |
| HNRNPDL | 5’-GCAAGAATCAGCAGGATGACGGTAA-3’ | 5’-CAAATCCAAATCCTCTTGATCTCCCAGTG-3’ |
| FTO | 5’-ACAACGGACAAGATGAAGTGGACATTA-3’ | 5’-CACTGCCACCGCTGACC-3’ |
| ALKBH5 | 5’-CTGTGCTTCGGCTGCAAGT-3’ | 5’-TCGGCGCTCCTTGATGTCC-3’ |
